# Supplementary material for: In silico design of misfolding resistant proteins: the role of structural similarity of a competing conformational ensemble in the optimization of frustration
Source: Royal Society of Chemistry journal article supplement (doi:10.1039/d4sm00171k), 2024-01-01
Supplement: d4sm00171k1.pdf [file d4sm00171k1.pdf]

## Supplementary Information: *In silico* design of misfolding resistant proteins: the role of structural aspect of competing conformational ensemble for optimization of frustration

Bondeepa Saikia and Anupaul Baruah<sup>a)</sup>

Department of Chemistry, Dibrugarh University, Dibrugarh-786004, India

(Dated: 27 February 2024)

The expressions for the stability gaps;  $\Delta_1$ ,  $\Delta_2$ ,  $\Delta_3$  and  $\Delta_4$  can be given as

$$\Delta_1 = E_f - \langle En_1 \rangle \quad (\text{S1})$$

$$\Delta_2 = E_f - \langle En_2 \rangle \quad (\text{S2})$$

$$\Delta_3 = E_f - \langle En_3 \rangle \quad (\text{S3})$$

$$\Delta_4 = E_f - \langle En_4 \rangle \quad (\text{S4})$$

Here, all terms have the same meaning as described in the manuscript.

For Eq. 19, there is a set of 2732 transcendental equations which determines the Lagrange undetermined multipliers. The variational functionals,  $V_1$ , is maximized with respect to 2600 ( $= 130 \times 20$ ) site identity monomer probabilities,  $\omega_i(\alpha)$ . This gives a set of 2600 nonlinear equations. Thus, equation 1 to 2600 are differential equations and the general form of this is expressed below,

$$\frac{\partial V_1}{\partial \omega_i(\alpha)} = \frac{\partial}{\partial \omega_i(\alpha)} (S - \lambda_{norm} f_{norm} - \lambda_1 \Delta_1 - \lambda_2 \Delta_2)$$

There are 130 normalization equations (equation 2601 to 2730) and can be obtained from Eq. 17. The general form of this is expressed below,

$$-1 + \sum_{\alpha=1}^m \omega_i(\alpha) = 0$$

Equations 2731 and 2732 are for foldability criteria  $\Delta_1$  and  $\Delta_2$  respectively. Thus, there are a set of 2732 ( $=2600+130+1+1$ ) nonlinear transcendental equations for Eq. 19. Similarly, for Eq. 20 to Eq. 24 there is a set of 2732 transcendental equations each.

### DEGREE OF FRUSTRATION IN DESIGNED SEQUENCES

Presence of frustration is an important aspect of protein folding and stability. The sections 3.3.3 and 3.3.4 provide insightful information about frustration in the designed sequences. Here, the Monte Carlo designed sequences corresponding to each method are analyzed for their degree of frustration at the target conformation based on the developed potential. It is already stated in the manuscript that the developed

TABLE S1. Attribution of degree of frustration to the amino acids at the target structure based on developed potential.

| Rank | Degree of frustration |
|------|-----------------------|
| 1    | 0                     |
| 2    | +1                    |
| 3    | +2                    |
| 4    | +3                    |
| 5    | +4                    |
| 6    | +5                    |

potential has specific potential values for each of the 20 amino acids at each of the six structural contexts,  $k=1, 2, 3, 4, 5,$  and  $6$ . For the calculation of degree of frustration, first for an amino acid,  $\alpha$  at  $i^{th}$  site in a designed sequence, the structural context of that site in the target structure is determined. Next, the potential values of an amino acid,  $\alpha$  are ranked from least to highest across all structural contexts. Based on this ranking, the degree of frustration are assigned to the amino acid,  $\alpha$  at  $i^{th}$  site of the target structure (refer to Table S1). Then, structural context of amino acid,  $\alpha$  at  $i^{th}$  site of the target is matched with its structural context in the potential and the corresponding degree of frustration is attributed. This is repeated for each amino acid in the designed sequence. Finally the total degree of frustration for each designed sequence is calculated by adding all these frustration values. The following equations are used to calculate degree of frustration,  $F_s^i(\alpha)$  of an amino acid,  $\alpha$  of a  $s^{th}$  sequence at  $i^{th}$  site of the target structure; total degree of frustration,  $F_s^{tot}(\alpha)$  in the whole sequence and its average,  $F_s^{avg}(\alpha)$  where  $N=130$ .

$$F_s^i(\alpha) = \begin{cases} 0, & \text{if } k \text{ is at rank } 1 \\ +1, & \text{if } k \text{ is at rank } 2 \\ +2, & \text{if } k \text{ is at rank } 3 \\ +3, & \text{if } k \text{ is at rank } 4 \\ +4, & \text{if } k \text{ is at rank } 5 \\ +5, & \text{if } k \text{ is at rank } 6 \end{cases}$$

$$F_s^{tot}(\alpha) = \sum_{i=1}^N F_s^i(\alpha)$$
$$F_s^{avg}(\alpha) = \frac{F_s^{tot}(\alpha)}{N}$$

In section 3.3.3, it is shown that among the design methods, method  $M_4$  designs more frustrated sequences. Moreover, it

<sup>a)</sup>Electronic mail: [anupaulbaruah@dibru.ac.in](mailto:anupaulbaruah@dibru.ac.in)

TABLE S2. Determination of degree of frustration of the designed sequences at the target structure based on developed potential.

| Method | Sl. No. of Sequence in TSR | Total Frustration | Average of Total Frustration |
|--------|----------------------------|-------------------|------------------------------|
| $M_2$  | 1                          | 247               | 252.8                        |
|        | 2                          | 265               |                              |
|        | 3                          | 264               |                              |
|        | 4                          | 251               |                              |
|        | 5                          | 237               |                              |
| $M_3$  | 1                          | 214               | 213.8                        |
|        | 2                          | 217               |                              |
|        | 3                          | 216               |                              |
|        | 4                          | 211               |                              |
|        | 5                          | 211               |                              |
| $M_4$  | 1                          | 246               | 244.8                        |
|        | 2                          | 244               |                              |
|        | 3                          | 246               |                              |
|        | 4                          | 246               |                              |
|        | 5                          | 242               |                              |
| $M_5$  | 1                          | 231               | 225.4                        |
|        | 2                          | 218               |                              |
|        | 3                          | 224               |                              |
|        | 4                          | 229               |                              |
|        | 5                          | 225               |                              |
| $M_6$  | 1                          | 192               | 209.2                        |
|        | 2                          | 217               |                              |
|        | 3                          | 226               |                              |
|        | 4                          | 195               |                              |
|        | 5                          | 216               |                              |
| $M_7$  | 1                          | 239               | 258.2                        |
|        | 2                          | 262               |                              |
|        | 3                          | 274               |                              |
|        | 4                          | 252               |                              |
|        | 5                          | 264               |                              |

is also shown that the method  $M_4$  is successful in designing sequences which are highly frustrated and specifically destabilize the non-native conformations. From Table S2 and Fig. S1, it can be seen that all the methods designs frustrated sequences. However, the average degree of frustration for the sequences designed by method  $M_4$  is 244.8. Although this average degree of frustration is not highest, however, this is in between the two extremes 209.2 (method  $M_6$ ) and 258.2 (method  $M_7$ ). This result indicates that method  $M_4$  designs frustrated sequence. It is also shown in the section 3.2.1 and 3.3.1 that method  $M_4$  designs more stable sequences in terms of percentage of Monte Carlo steps populated in the target state ensemble. This observation has bolstered our previous findings that method  $M_4$  designs frustrated, however, stable sequences at the target structure.

Self consistent mean field theory provides sequences in the form site identity monomer probabilities. Therefore, distribution graphs (Fig. S2(a)- S2(t)) are plotted for the comparison of site-identity monomer probabilities of some sequences designed by the methods  $M_2$ ,  $M_4$  and  $M_7$ . The comparison is done between two DSG methods  $M_2$ ,  $M_4$  and method  $M_7$ . The two DSG methods are chosen based on the percentage of Monte Carlo steps population in the target state ensemble, method  $M_2$  having the lowest percentage of Monte Carlo steps population and method  $M_4$  with its highest value (see Table 5). While method  $M_7$  is having lowest percentage of Monte Carlo steps population among all methods. A distribution plot, say Fig. S2(a), shows the monomer probabilities of alanine at all 130 residue sites of the sequences designed by the three selected methods  $M_2$ ,  $M_4$  and  $M_7$ . Similar distribution graphs are plotted for the remaining amino acid residues showing their monomer probabilities at each of the 130 sites. Since only generalized conclusion can be drawn from the method applied here for designing sequences, it is difficult to comment whether a specific residue will be conserved at particular site of the target structure.

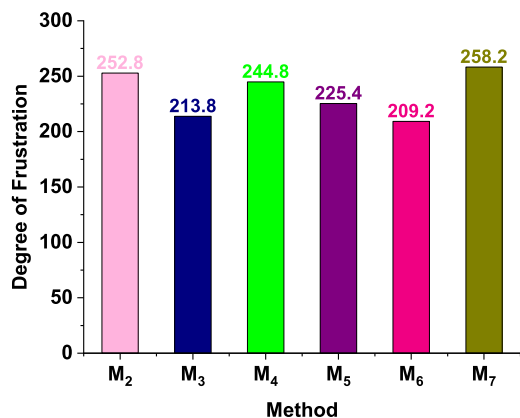

Fig. S1. Plot of degree of frustration for the sequences designed using method  $M_2$ ,  $M_3$ ,  $M_4$ ,  $M_5$ ,  $M_6$  and  $M_7$ .

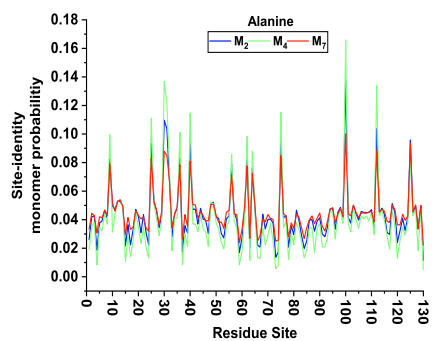

(a)

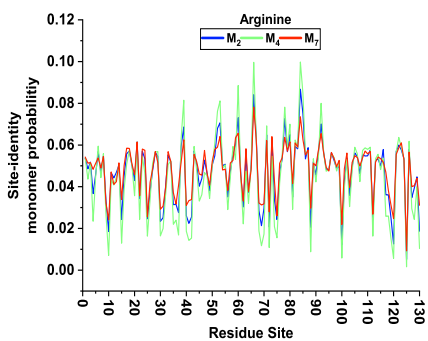

(b)

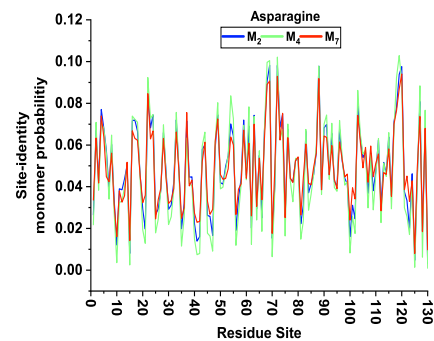

(c)

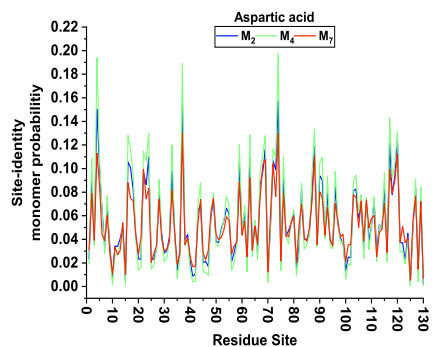

(d)

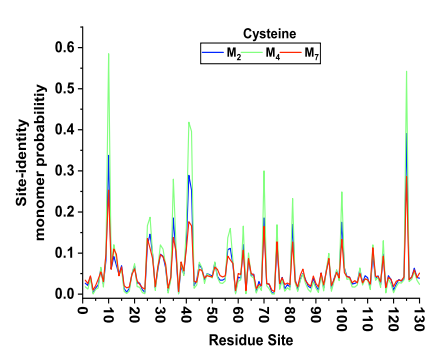

(e)

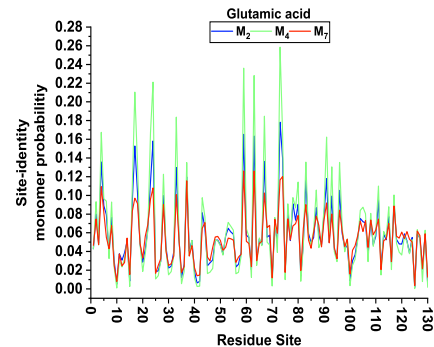

(f)

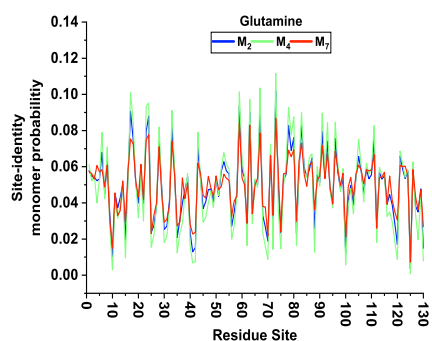

(g)

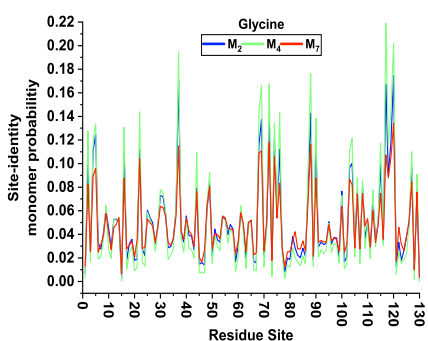

(h)

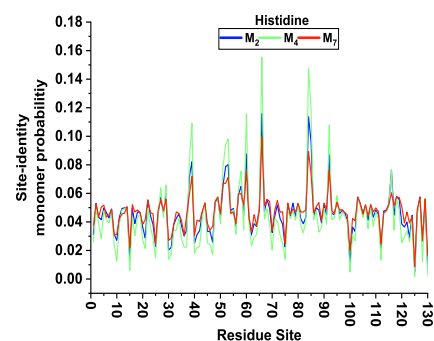

(i)

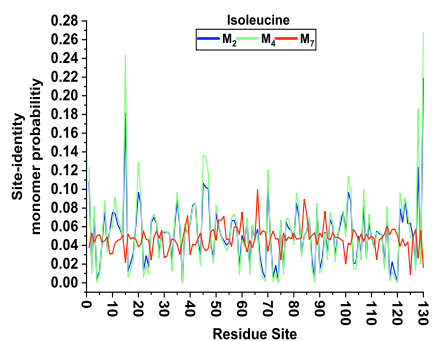

(j)

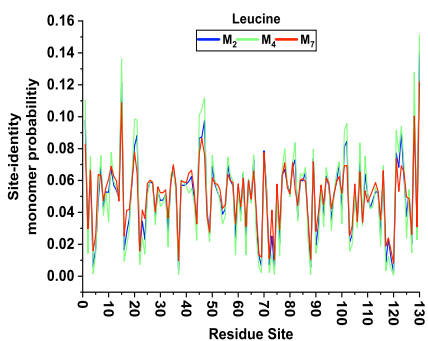

(k)

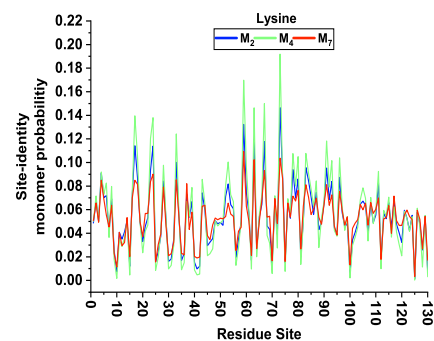

(l)

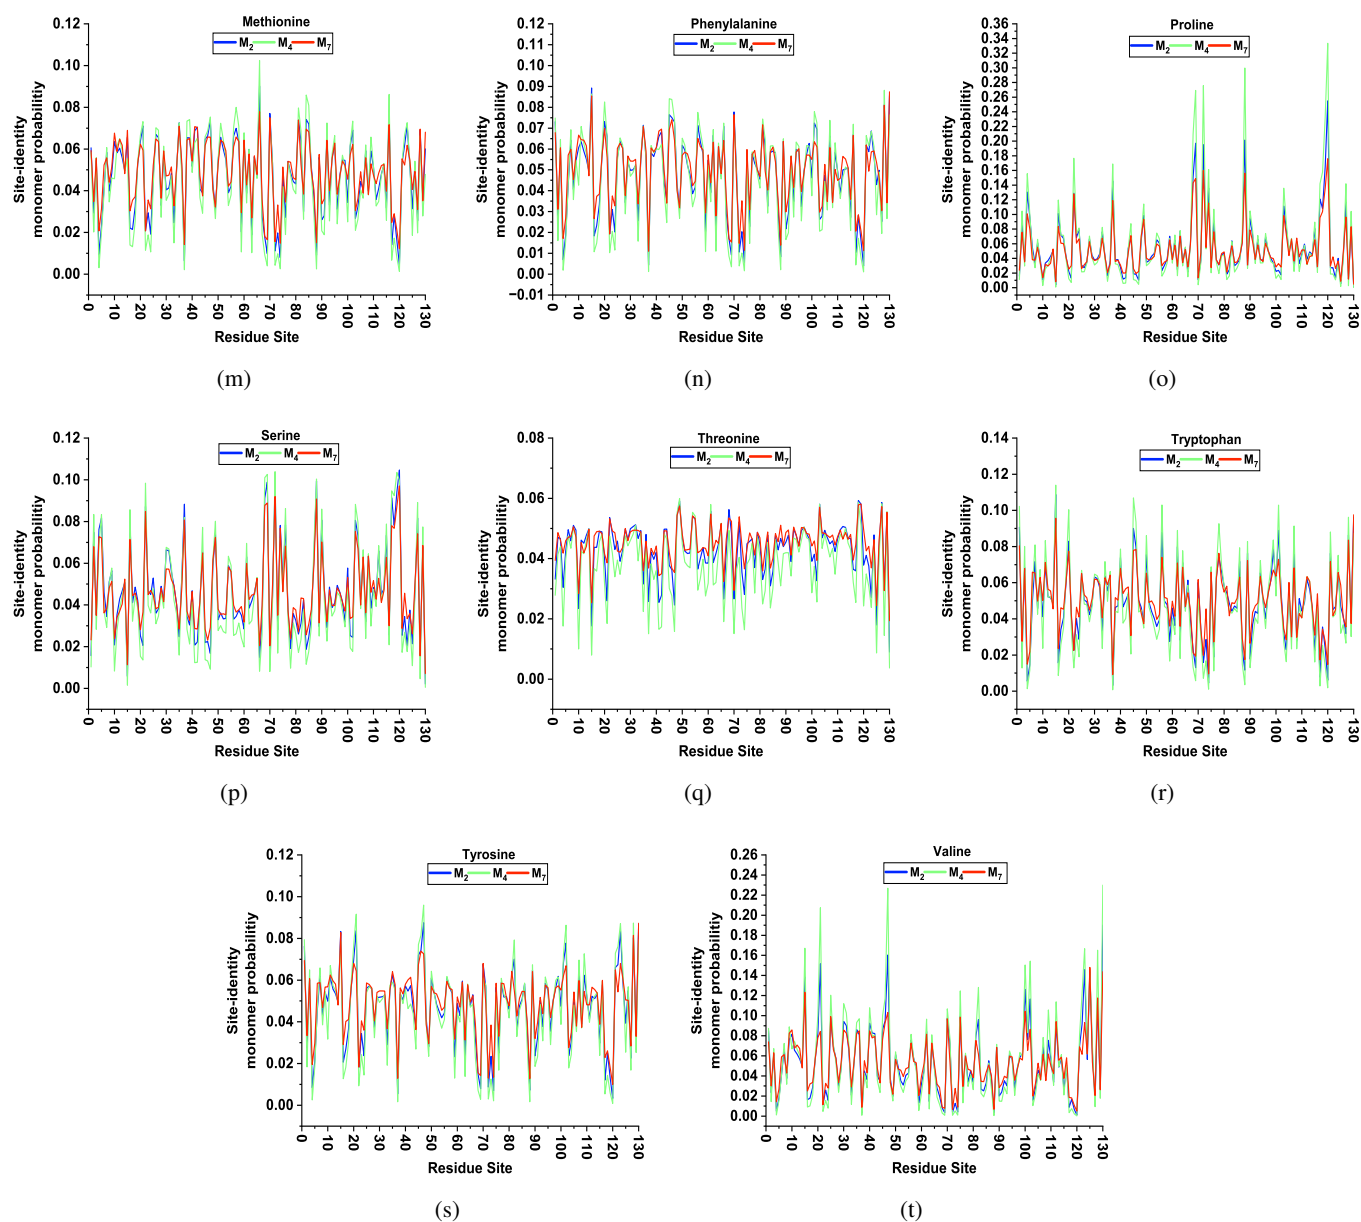

Fig. S2. Distribution plot of site-identity monomer probability vs. residue sites for the sequences corresponding to lowest foldability values designed by methods  $M_2$ ,  $M_4$ , and  $M_7$ .

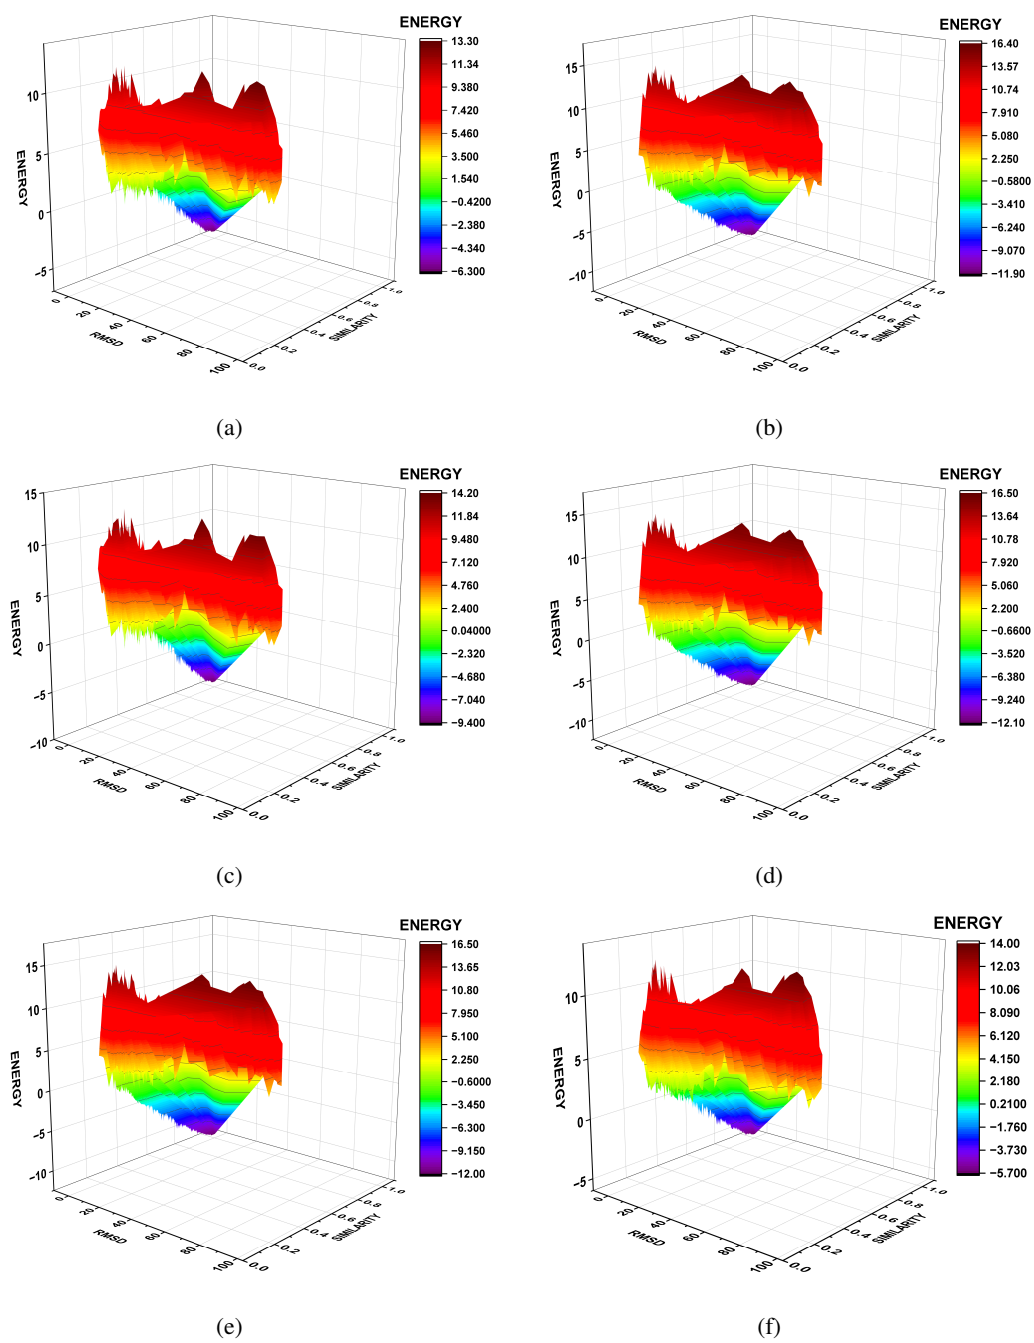

Fig. S3. Energy landscape contours of the sequences having lowest  $\Delta$  value designed using (a)  $M_2$ , (b)  $M_3$ , (c)  $M_4$ , (d)  $M_5$ , (e)  $M_6$ , (f)  $M_7$

TABLE S3. Results of Monte Carlo simulations on the sequences designed by Monte Carlo simulation method.

| Method | Sequence in TSR                           | Number of refolding | Steps in target(%) | Average of steps in target (%) |
|--------|-------------------------------------------|---------------------|--------------------|--------------------------------|
| $M_2$  | $\Delta_1=-1.2805$<br>$\Delta_3=-6.8465$  | 7674                | 63.57              | 54.73                          |
|        | $\Delta_1=-1.2806$<br>$\Delta_3=-6.8283$  | 7654                | 46.75              |                                |
|        | $\Delta_1=-1.2806$<br>$\Delta_3=-6.8307$  | 7644                | 47.25              |                                |
|        | $\Delta_1=-1.2806$<br>$\Delta_3=-6.8313$  | 7674                | 63.57              |                                |
|        | $\Delta_1=-1.2806$<br>$\Delta_3=-6.8376$  | 7666                | 52.51              |                                |
|        | $\Delta_1=-1.2105$<br>$\Delta_4=-13.2776$ | 7643                | 56.07              |                                |
|        | $\Delta_1=-1.2105$<br>$\Delta_4=-13.2782$ | 7649                | 56.16              |                                |
| $M_3$  | $\Delta_1=-1.2106$<br>$\Delta_4=-13.2768$ | 7644                | 56.34              | 55.91                          |
|        | $\Delta_1=-1.2106$<br>$\Delta_4=-13.2775$ | 7642                | 56.16              |                                |
|        | $\Delta_1=-1.2103$<br>$\Delta_4=-13.2768$ | 7626                | 54.82              |                                |
|        | $\Delta_2=-4.1528$<br>$\Delta_3=-8.7561$  | 7655                | 74.78              |                                |
|        | $\Delta_2=-4.1527$<br>$\Delta_3=-8.7395$  | 7655                | 73.48              |                                |
|        | $\Delta_2=-4.1523$<br>$\Delta_3=-8.7372$  | 7654                | 73.49              |                                |
|        | $\Delta_2=-4.1508$<br>$\Delta_3=-8.7470$  | 7655                | 73.48              |                                |
| $M_4$  | $\Delta_2=-4.1555$<br>$\Delta_3=-8.7147$  | 7654                | 74.57              | <b>73.96</b>                   |
|        | $\Delta_2=-3.1738$<br>$\Delta_4=-13.4279$ | 7660                | 56.01              |                                |
|        | $\Delta_2=-3.1734$<br>$\Delta_4=-13.4176$ | 7684                | 68.08              |                                |
|        | $\Delta_2=-3.1736$<br>$\Delta_4=-13.4195$ | 7678                | 68.45              |                                |
|        | $\Delta_2=-3.1737$<br>$\Delta_4=-13.4120$ | 7675                | 55.26              |                                |
|        | $\Delta_2=-3.1737$<br>$\Delta_4=-13.4462$ | 7684                | 64.22              |                                |
|        | $\Delta_3=-7.0678$<br>$\Delta_4=-13.2386$ | 7668                | 61.41              |                                |
| $M_5$  | $\Delta_3=-7.0645$<br>$\Delta_4=-13.2442$ | 7655                | 66.42              | 62.40                          |
|        | $\Delta_3=-7.0623$<br>$\Delta_4=-13.2155$ | 7688                | 70.38              |                                |
|        | $\Delta_3=-7.0647$<br>$\Delta_4=-13.2221$ | 7662                | 63.49              |                                |
|        | $\Delta_3=-7.0638$<br>$\Delta_4=-13.2105$ | 7697                | 69.97              |                                |
|        | $\Delta=-6.2101$                          | 7526                | 68.05              |                                |
|        | $\Delta=-6.2102$                          | 7108                | 60.41              |                                |
|        | $\Delta=-6.2103$                          | 7609                | 64.69              |                                |
| $M_6$  | $\Delta=-6.2104$                          | 7664                | 59.81              | 64.65                          |
|        | $\Delta=-6.2105$                          | 7378                | 70.27              |                                |

TABLE S4. Comparison of the sequences designed by Monte Carlo simulation method with the sequences designed by mean field method. **(Bold figures in black color indicates class; number of sites in parentheses are in blue color; percentages in brackets are in magenta color.)**

| Method           | Sequence in<br>TSR  | Class           |         |         |         |
|------------------|---------------------|-----------------|---------|---------|---------|
|                  |                     | Number of sites |         |         |         |
|                  |                     | Percentage (%)  |         |         |         |
|                  |                     | 1-3             | 4-6     | 7-10    | 11-20   |
| $M_2$            | $\Delta_1=-1.2805$  | (34)            | (30)    | (31)    | (35)    |
|                  | $\Delta_3=-6.8465$  | [26.15]         | [23.07] | [23.84] | [26.92] |
|                  | $\Delta_1=-1.2806$  | (31)            | (38)    | (30)    | (31)    |
|                  | $\Delta_3=-6.8283$  | [23.84]         | [29.23] | [23.07] | [23.84] |
|                  | $\Delta_1=-1.2806$  | (33)            | (34)    | (30)    | (33)    |
|                  | $\Delta_3=-6.8307$  | [25.38]         | [26.15] | [23.07] | [25.38] |
|                  | $\Delta_1=-1.2806$  | (34)            | (30)    | (30)    | (36)    |
|                  | $\Delta_3=-6.8313$  | [26.15]         | [23.07] | [23.07] | [27.69] |
|                  | $\Delta_1=-1.2806$  | (33)            | (31)    | (29)    | (37)    |
|                  | $\Delta_3=-6.8376$  | [25.38]         | [23.84] | [22.30] | [28.46] |
| $M_3$            | $\Delta_1=-1.2105$  | (40)            | (28)    | (27)    | (35)    |
|                  | $\Delta_4=-13.2776$ | [30.76]         | [21.53] | [20.76] | [26.92] |
|                  | $\Delta_1=-1.2105$  | (40)            | (28)    | (27)    | (35)    |
|                  | $\Delta_4=-13.2782$ | [30.76]         | [21.53] | [20.76] | [26.92] |
|                  | $\Delta_1=-1.2106$  | (40)            | (29)    | (26)    | (35)    |
|                  | $\Delta_4=-13.2768$ | [30.76]         | [22.30] | [20.00] | [26.92] |
|                  | $\Delta_1=-1.2106$  | (40)            | (28)    | (27)    | (35)    |
|                  | $\Delta_4=-13.2775$ | [30.76]         | [21.53] | [20.76] | [26.92] |
| $M_4$            | $\Delta_1=-1.2103$  | (41)            | (29)    | (24)    | (36)    |
|                  | $\Delta_4=-13.2768$ | [31.53]         | [22.30] | [18.46] | [27.69] |
|                  | $\Delta_2=-4.1528$  | (48)            | (28)    | (25)    | (29)    |
|                  | $\Delta_3=-8.7561$  | [36.92]         | [21.53] | [19.23] | [22.30] |
|                  | $\Delta_2=-4.1527$  | (48)            | (28)    | (24)    | (30)    |
|                  | $\Delta_3=-8.7395$  | [36.92]         | [21.53] | [18.46] | [23.07] |
|                  | $\Delta_2=-4.1523$  | (47)            | (29)    | (25)    | (29)    |
|                  | $\Delta_3=-8.7372$  | [36.15]         | [22.30] | [19.23] | [22.30] |
|                  | $\Delta_2=-4.1508$  | (48)            | (28)    | (25)    | (29)    |
|                  | $\Delta_3=-8.7470$  | [36.92]         | [21.53] | [19.23] | [22.30] |
| $M_5$            | $\Delta_2=-4.1555$  | (47)            | (28)    | (25)    | (30)    |
|                  | $\Delta_3=-8.7147$  | [36.15]         | [21.53] | [19.23] | [23.07] |
|                  | $\Delta_2=-3.1738$  | (34)            | (25)    | (33)    | (38)    |
|                  | $\Delta_4=-13.4279$ | [26.15]         | [19.23] | [25.38] | [29.23] |
|                  | $\Delta_2=-3.1734$  | (41)            | (26)    | (31)    | (32)    |
|                  | $\Delta_4=-13.4176$ | [31.53]         | [20.00] | [23.84] | [24.61] |
|                  | $\Delta_2=-3.1736$  | (37)            | (31)    | (34)    | (28)    |
|                  | $\Delta_4=-13.4195$ | [28.46]         | [23.84] | [26.15] | [21.53] |
|                  | $\Delta_2=-3.1737$  | (38)            | (27)    | (27)    | (38)    |
|                  | $\Delta_4=-13.4120$ | [29.23]         | [20.76] | [20.76] | [29.23] |
| $M_6$            | $\Delta_2=-3.1737$  | (42)            | (25)    | (29)    | (34)    |
|                  | $\Delta_4=-13.4462$ | [32.30]         | [19.23] | [22.30] | [26.15] |
|                  | $\Delta_3=-7.0678$  | (35)            | (38)    | (25)    | (32)    |
|                  | $\Delta_4=-13.2386$ | [26.92]         | [29.23] | [19.23] | [24.61] |
|                  | $\Delta_3=-7.0645$  | (41)            | (27)    | (23)    | (39)    |
|                  | $\Delta_4=-13.2442$ | [31.53]         | [20.76] | [17.69] | [30.00] |
|                  | $\Delta_3=-7.0623$  | (38)            | (28)    | (27)    | (37)    |
|                  | $\Delta_4=-13.2155$ | [29.23]         | [21.53] | [20.76] | [28.46] |
|                  | $\Delta_3=-7.0647$  | (42)            | (22)    | (32)    | (34)    |
|                  | $\Delta_4=-13.2221$ | [32.30]         | [16.92] | [24.61] | [26.15] |
| $M_7$            | $\Delta_3=-7.0638$  | (35)            | (36)    | (28)    | (31)    |
|                  | $\Delta_4=-13.2105$ | [26.92]         | [27.69] | [21.53] | [23.84] |
|                  | $\Delta=-6.2101$    | (24)            | (28)    | (35)    | (43)    |
|                  |                     | [18.46]         | [21.53] | [26.92] | [33.07] |
|                  | $\Delta=-6.2102$    | (30)            | (23)    | (40)    | (37)    |
|                  |                     | [23.07]         | [17.69] | [30.76] | [28.46] |
|                  | $\Delta=-6.2103$    | (22)            | (34)    | (33)    | (41)    |
|                  |                     | [16.92]         | [26.15] | [25.38] | [31.53] |
|                  | $\Delta=-6.2104$    | (30)            | (16)    | (40)    | (44)    |
|                  |                     | [23.07]         | [12.30] | [30.76] | [33.84] |
| $\Delta=-6.2105$ | (29)                | (29)            | (33)    | (39)    |         |
|                  | [22.30]             | [22.30]         | [25.38] | [30.00] |         |

TABLE S5. The averages over the percentage of number of sites belonging to class 1–3 for each method. (**Bold figures indicate class;** number of sites in parentheses are in blue color; percentages in brackets are in magenta color.)

| Method | Sequence in<br>TSR  | Class           |                | Average<br>over the<br>percentage(%) |
|--------|---------------------|-----------------|----------------|--------------------------------------|
|        |                     | Number of sites | Percentage (%) |                                      |
| $M_2$  | $\Delta_1=-1.2805$  | (34)            |                | 25.38                                |
|        | $\Delta_3=-6.8465$  | [26.15]         |                |                                      |
|        | $\Delta_1=-1.2806$  | (31)            |                |                                      |
|        | $\Delta_3=-6.8283$  | [23.84]         |                |                                      |
|        | $\Delta_1=-1.2806$  | (33)            |                |                                      |
|        | $\Delta_3=-6.8307$  | [25.38]         |                |                                      |
|        | $\Delta_1=-1.2806$  | (34)            |                |                                      |
|        | $\Delta_3=-6.8313$  | [26.15]         |                |                                      |
| $M_3$  | $\Delta_1=-1.2806$  | (33)            |                | 30.91                                |
|        | $\Delta_3=-6.8376$  | [25.38]         |                |                                      |
|        | $\Delta_1=-1.2105$  | (40)            |                |                                      |
|        | $\Delta_4=-13.2776$ | [30.76]         |                |                                      |
|        | $\Delta_1=-1.2105$  | (40)            |                |                                      |
|        | $\Delta_4=-13.2782$ | [30.76]         |                |                                      |
|        | $\Delta_1=-1.2106$  | (40)            |                |                                      |
|        | $\Delta_4=-13.2768$ | [30.76]         |                |                                      |
| $M_4$  | $\Delta_1=-1.2106$  | (40)            |                | <b>36.61</b>                         |
|        | $\Delta_4=-13.2775$ | [30.76]         |                |                                      |
|        | $\Delta_1=-1.2103$  | (41)            |                |                                      |
|        | $\Delta_4=-13.2768$ | [31.53]         |                |                                      |
|        | $\Delta_2=-4.1528$  | (48)            |                |                                      |
|        | $\Delta_3=-8.7561$  | [36.92]         |                |                                      |
|        | $\Delta_2=-4.1527$  | (48)            |                |                                      |
|        | $\Delta_3=-8.7395$  | [36.92]         |                |                                      |
| $M_5$  | $\Delta_2=-4.1523$  | (47)            |                | 29.53                                |
|        | $\Delta_3=-8.7372$  | [36.15]         |                |                                      |
|        | $\Delta_2=-4.1508$  | (48)            |                |                                      |
|        | $\Delta_3=-8.7470$  | [36.92]         |                |                                      |
|        | $\Delta_2=-4.1555$  | (47)            |                |                                      |
|        | $\Delta_3=-8.7147$  | [36.15]         |                |                                      |
|        | $\Delta_2=-3.1738$  | (34)            |                |                                      |
|        | $\Delta_4=-13.4279$ | [26.15]         |                |                                      |
| $M_6$  | $\Delta_2=-3.1734$  | (41)            |                | 29.38                                |
|        | $\Delta_4=-13.4176$ | [31.53]         |                |                                      |
|        | $\Delta_2=-3.1736$  | (37)            |                |                                      |
|        | $\Delta_4=-13.4195$ | [28.46]         |                |                                      |
|        | $\Delta_2=-3.1737$  | (38)            |                |                                      |
|        | $\Delta_4=-13.4120$ | [29.23]         |                |                                      |
|        | $\Delta_2=-3.1737$  | (42)            |                |                                      |
|        | $\Delta_4=-13.4462$ | [32.30]         |                |                                      |
| $M_7$  | $\Delta_3=-7.0678$  | (35)            |                | 20.76                                |
|        | $\Delta_4=-13.2386$ | [26.92]         |                |                                      |
|        | $\Delta_3=-7.0645$  | (41)            |                |                                      |
|        | $\Delta_4=-13.2442$ | [31.53]         |                |                                      |
|        | $\Delta_3=-7.0623$  | (38)            |                |                                      |
|        | $\Delta_4=-13.2155$ | [29.23]         |                |                                      |
|        | $\Delta_3=-7.0647$  | (42)            |                |                                      |
|        | $\Delta_4=-13.2221$ | [32.30]         |                |                                      |
| $M_7$  | $\Delta_3=-7.0638$  | (35)            |                | 20.76                                |
|        | $\Delta_4=-13.2105$ | [26.92]         |                |                                      |
|        | $\Delta=-6.2101$    | (24)            |                |                                      |
|        |                     | [18.46]         |                |                                      |
|        | $\Delta=-6.2102$    | (30)            |                |                                      |
| $M_7$  |                     | [23.07]         |                | 20.76                                |
|        | $\Delta=-6.2103$    | (22)            |                |                                      |
|        |                     | [16.92]         |                |                                      |
|        | $\Delta=-6.2104$    | (30)            |                |                                      |
|        |                     | [23.07]         |                |                                      |
| $M_7$  | $\Delta=-6.2105$    | (29)            |                | 20.76                                |
|        |                     | [22.30]         |                |                                      |



TABLE S6. Comparison of Monte Carlo designed sequences with the target sequence based on structural context similarity.

| Method | Sequence in TSR     | Number of sites with same k as in target | Percentage(%) | Average over the percentage(%) |
|--------|---------------------|------------------------------------------|---------------|--------------------------------|
| $M_2$  | $\Delta_1=-1.2805$  | 28                                       | 21.53         | 21.99                          |
|        | $\Delta_3=-6.8465$  |                                          |               |                                |
|        | $\Delta_1=-1.2806$  | 28                                       | 21.53         |                                |
|        | $\Delta_3=-6.8283$  |                                          |               |                                |
|        | $\Delta_1=-1.2806$  | 29                                       | 22.30         |                                |
|        | $\Delta_3=-6.8307$  |                                          |               |                                |
|        | $\Delta_1=-1.2806$  | 28                                       | 21.53         |                                |
|        | $\Delta_3=-6.8313$  |                                          |               |                                |
| $M_3$  | $\Delta_1=-1.2806$  | 30                                       | 23.07         | 28.31                          |
|        | $\Delta_3=-6.8376$  |                                          |               |                                |
|        | $\Delta_1=-1.2105$  | 36                                       | 27.69         |                                |
|        | $\Delta_4=-13.2776$ |                                          |               |                                |
|        | $\Delta_1=-1.2105$  | 36                                       | 27.69         |                                |
|        | $\Delta_4=-13.2782$ |                                          |               |                                |
|        | $\Delta_1=-1.2106$  | 37                                       | 28.46         |                                |
|        | $\Delta_4=-13.2768$ |                                          |               |                                |
| $M_4$  | $\Delta_1=-1.2106$  | 37                                       | 28.46         | 20.30                          |
|        | $\Delta_4=-13.2775$ |                                          |               |                                |
|        | $\Delta_1=-1.2103$  | 38                                       | 29.23         |                                |
|        | $\Delta_4=-13.2768$ |                                          |               |                                |
|        | $\Delta_2=-4.1528$  | 26                                       | 20.00         |                                |
|        | $\Delta_3=-8.7561$  |                                          |               |                                |
|        | $\Delta_2=-4.1527$  | 26                                       | 20.00         |                                |
|        | $\Delta_3=-8.7395$  |                                          |               |                                |
| $M_5$  | $\Delta_2=-4.1523$  | 27                                       | 20.76         | 25.84                          |
|        | $\Delta_3=-8.7372$  |                                          |               |                                |
|        | $\Delta_2=-4.1508$  | 26                                       | 20.00         |                                |
|        | $\Delta_3=-8.7470$  |                                          |               |                                |
|        | $\Delta_2=-4.1555$  | 27                                       | 20.76         |                                |
|        | $\Delta_3=-8.7147$  |                                          |               |                                |
|        | $\Delta_2=-3.1738$  | 33                                       | 25.38         |                                |
|        | $\Delta_4=-13.4279$ |                                          |               |                                |
| $M_6$  | $\Delta_2=-3.1734$  | 34                                       | 26.15         | 27.38                          |
|        | $\Delta_4=-13.4176$ |                                          |               |                                |
|        | $\Delta_2=-3.1736$  | 33                                       | 25.38         |                                |
|        | $\Delta_4=-13.4195$ |                                          |               |                                |
|        | $\Delta_2=-3.1737$  | 34                                       | 26.15         |                                |
|        | $\Delta_4=-13.4120$ |                                          |               |                                |
|        | $\Delta_2=-3.1737$  | 34                                       | 26.15         |                                |
|        | $\Delta_4=-13.4462$ |                                          |               |                                |
| $M_7$  | $\Delta_3=-7.0678$  | 36                                       | 27.69         | 21.53                          |
|        | $\Delta_4=-13.2386$ |                                          |               |                                |
|        | $\Delta_3=-7.0645$  | 36                                       | 27.69         |                                |
|        | $\Delta_4=-13.2442$ |                                          |               |                                |
|        | $\Delta_3=-7.0623$  | 35                                       | 26.92         |                                |
|        | $\Delta_4=-13.2155$ |                                          |               |                                |
|        | $\Delta_3=-7.0647$  | 36                                       | 27.69         |                                |
|        | $\Delta_4=-13.2221$ |                                          |               |                                |
| $M_8$  | $\Delta_3=-7.0638$  | 35                                       | 26.92         | 21.53                          |
|        | $\Delta_4=-13.2105$ |                                          |               |                                |
|        | $\Delta=-6.2101$    | 30                                       | 23.07         |                                |
|        | $\Delta=-6.2102$    | 30                                       | 23.07         |                                |
|        | $\Delta=-6.2103$    | 23                                       | 17.69         |                                |
| $M_9$  | $\Delta=-6.2104$    | 27                                       | 20.76         | 23.07                          |
|        | $\Delta=-6.2105$    | 30                                       | 23.07         |                                |

TABLE S7. Determination of structural context (k) similarity between the k of Monte Carlo designed sequences and the k of unfolded conformations.

| Method   | Sequence in TSR     | Average Percentage of structural context similarity over unfolded conformations(%) | Average over the percentage(%) |
|----------|---------------------|------------------------------------------------------------------------------------|--------------------------------|
| $M_2$    | $\Delta_1=-1.2805$  | 16.80                                                                              | 16.84                          |
|          | $\Delta_3=-6.8465$  |                                                                                    |                                |
|          | $\Delta_1=-1.2806$  | 16.41                                                                              |                                |
|          | $\Delta_3=-6.8283$  |                                                                                    |                                |
|          | $\Delta_1=-1.2806$  | 16.61                                                                              |                                |
|          | $\Delta_3=-6.8307$  |                                                                                    |                                |
|          | $\Delta_1=-1.2806$  | 16.80                                                                              |                                |
| $M_3$    | $\Delta_1=-1.2806$  | 16.80                                                                              | 20.94                          |
|          | $\Delta_3=-6.8313$  |                                                                                    |                                |
|          | $\Delta_1=-1.2806$  | 17.59                                                                              |                                |
|          | $\Delta_3=-6.8376$  |                                                                                    |                                |
|          | $\Delta_1=-1.2105$  | 20.46                                                                              |                                |
|          | $\Delta_4=-13.2776$ |                                                                                    |                                |
|          | $\Delta_1=-1.2105$  | 20.60                                                                              |                                |
| $M_4$    | $\Delta_4=-13.2782$ |                                                                                    | 14.51                          |
|          | $\Delta_1=-1.2106$  | 21.12                                                                              |                                |
|          | $\Delta_4=-13.2768$ |                                                                                    |                                |
|          | $\Delta_1=-1.2106$  | 21.12                                                                              |                                |
|          | $\Delta_4=-13.2775$ |                                                                                    |                                |
|          | $\Delta_1=-1.2103$  | 21.41                                                                              |                                |
|          | $\Delta_4=-13.2768$ |                                                                                    |                                |
| $M_5$    | $\Delta_2=-4.1528$  | 14.21                                                                              | 19.46                          |
|          | $\Delta_3=-8.7561$  |                                                                                    |                                |
|          | $\Delta_2=-4.1527$  | 14.28                                                                              |                                |
|          | $\Delta_3=-8.7395$  |                                                                                    |                                |
|          | $\Delta_2=-4.1523$  | 15.03                                                                              |                                |
|          | $\Delta_3=-8.7372$  |                                                                                    |                                |
|          | $\Delta_2=-4.1508$  | 14.19                                                                              |                                |
| $M_6$    | $\Delta_3=-8.7470$  |                                                                                    | 21.79                          |
|          | $\Delta_2=-4.1555$  | 14.84                                                                              |                                |
|          | $\Delta_3=-8.7147$  |                                                                                    |                                |
|          | $\Delta_2=-3.1738$  | 20.40                                                                              |                                |
|          | $\Delta_4=-13.4279$ |                                                                                    |                                |
|          | $\Delta_2=-3.1734$  | 18.75                                                                              |                                |
|          | $\Delta_4=-13.4176$ |                                                                                    |                                |
| $M_7$    | $\Delta_2=-3.1736$  | 19.41                                                                              | 17.75                          |
|          | $\Delta_4=-13.4195$ |                                                                                    |                                |
|          | $\Delta_2=-3.1737$  | 20.28                                                                              |                                |
|          | $\Delta_4=-13.4120$ |                                                                                    |                                |
|          | $\Delta_2=-3.1737$  | 18.49                                                                              |                                |
|          | $\Delta_4=-13.4462$ |                                                                                    |                                |
|          | $\Delta_3=-7.0678$  | 21.96                                                                              |                                |
| $M_8$    | $\Delta_4=-13.2386$ |                                                                                    | 21.79                          |
|          | $\Delta_3=-7.0645$  | 20.29                                                                              |                                |
|          | $\Delta_4=-13.2442$ |                                                                                    |                                |
|          | $\Delta_3=-7.0623$  | 22.86                                                                              |                                |
|          | $\Delta_4=-13.2155$ |                                                                                    |                                |
|          | $\Delta_3=-7.0647$  | 22.27                                                                              |                                |
|          | $\Delta_4=-13.2221$ |                                                                                    |                                |
| $M_9$    | $\Delta_3=-7.0638$  | 21.60                                                                              | 17.75                          |
|          | $\Delta_4=-13.2105$ |                                                                                    |                                |
|          | $\Delta=-6.2101$    | 19.53                                                                              |                                |
|          | $\Delta=-6.2102$    | 17.81                                                                              |                                |
|          | $\Delta=-6.2103$    | 14.73                                                                              |                                |
| $M_{10}$ | $\Delta=-6.2104$    | 17.93                                                                              | 17.75                          |
|          | $\Delta=-6.2105$    | 17.75                                                                              |                                |

TABLE S8. Binning of number of non-native conformations according to their percentage of structural context similarity. (Bins of structural context similarity percentage are in blue color; number of non-native conformations are in black color)

| Method                                    | Sequence in TSR                           | Bins of structural context similarity percentage |       |        |        |        |        |        |
|-------------------------------------------|-------------------------------------------|--------------------------------------------------|-------|--------|--------|--------|--------|--------|
|                                           |                                           | Number of non-native conformations               |       |        |        |        |        |        |
|                                           |                                           | 0-5                                              | 5-10  | 10-15  | 15-20  | 20-25  | 25-30  | 30-100 |
| $M_2$                                     | $\Delta_1=-1.2805$<br>$\Delta_3=-6.8465$  | 6                                                | 2047  | 68914  | 154633 | 46660  | 302    | 14     |
|                                           | $\Delta_1=-1.2806$<br>$\Delta_3=-6.8283$  | 2                                                | 1925  | 77713  | 160209 | 32456  | 263    | 8      |
|                                           | $\Delta_1=-1.2806$<br>$\Delta_3=-6.8307$  | 2                                                | 2121  | 75956  | 151677 | 42624  | 186    | 10     |
|                                           | $\Delta_1=-1.2806$<br>$\Delta_3=-6.8313$  | 6                                                | 2039  | 68993  | 154637 | 46574  | 312    | 15     |
|                                           | $\Delta_1=-1.2806$<br>$\Delta_3=-6.8376$  | 2                                                | 842   | 51760  | 149938 | 69019  | 988    | 27     |
|                                           | $M_3$                                     | $\Delta_1=-1.2105$<br>$\Delta_4=-13.2776$        | 0     | 331    | 18353  | 90368  | 134034 | 29376  |
| $\Delta_1=-1.2105$<br>$\Delta_4=-13.2782$ |                                           | 0                                                | 283   | 16956  | 87435  | 136981 | 30785  | 136    |
| $\Delta_1=-1.2106$<br>$\Delta_4=-13.2768$ |                                           | 0                                                | 283   | 13912  | 77717  | 139199 | 41041  | 424    |
| $\Delta_1=-1.2106$<br>$\Delta_4=-13.2775$ |                                           | 0                                                | 283   | 13912  | 77717  | 139199 | 41041  | 424    |
| $\Delta_1=-1.2103$<br>$\Delta_4=-13.2768$ |                                           | 0                                                | 256   | 13474  | 74442  | 132387 | 50497  | 1520   |
| $M_4$                                     |                                           | $\Delta_2=-4.1528$<br>$\Delta_3=-8.7561$         | 18    | 11343  | 157152 | 97387  | 6468   | 177    |
|                                           | $\Delta_2=-4.1527$<br>$\Delta_3=-8.7395$  | 14                                               | 10599 | 155573 | 99552  | 6642   | 172    | 24     |
|                                           | $\Delta_2=-4.1523$<br>$\Delta_3=-8.7372$  | 3                                                | 5766  | 130149 | 123732 | 12728  | 173    | 25     |
|                                           | $\Delta_2=-4.1508$<br>$\Delta_3=-8.7470$  | 18                                               | 11659 | 157956 | 96403  | 6334   | 175    | 31     |
|                                           | $\Delta_2=-4.1555$<br>$\Delta_3=-8.7147$  | 17                                               | 7183  | 137299 | 115782 | 12080  | 187    | 28     |
|                                           | $M_5$                                     | $\Delta_2=-3.1738$<br>$\Delta_4=-13.4279$        | 0     | 363    | 17392  | 88901  | 143527 | 22028  |
| $\Delta_2=-3.1734$<br>$\Delta_4=-13.4176$ |                                           | 16                                               | 1077  | 36665  | 123095 | 103157 | 8545   | 21     |
| $\Delta_2=-3.1736$<br>$\Delta_4=-13.4195$ |                                           | 6                                                | 807   | 26509  | 110915 | 123019 | 11302  | 18     |
| $\Delta_2=-3.1737$<br>$\Delta_4=-13.4120$ |                                           | 2                                                | 348   | 18157  | 91455  | 141936 | 20582  | 96     |
| $\Delta_2=-3.1737$<br>$\Delta_4=-13.4462$ |                                           | 6                                                | 1126  | 41871  | 126218 | 96388  | 6940   | 27     |
| $M_6$                                     |                                           | $\Delta_3=-7.0678$<br>$\Delta_4=-13.2386$        | 2     | 303    | 8877   | 58851  | 147721 | 55035  |
|                                           | $\Delta_3=-7.0645$<br>$\Delta_4=-13.2442$ | 6                                                | 648   | 19565  | 92771  | 133238 | 26000  | 348    |
|                                           | $\Delta_3=-7.0623$<br>$\Delta_4=-13.2155$ | 1                                                | 205   | 5425   | 37508  | 154336 | 71622  | 3479   |
|                                           | $\Delta_3=-7.0647$<br>$\Delta_4=-13.2221$ | 7                                                | 455   | 9407   | 52643  | 143138 | 63903  | 3023   |
|                                           | $\Delta_3=-7.0638$<br>$\Delta_4=-13.2105$ | 4                                                | 341   | 9919   | 63939  | 152687 | 44608  | 1078   |
|                                           | $M_7$                                     | $\Delta=-6.2101$                                 | 7     | 547    | 18619  | 112418 | 135190 | 5755   |
| $\Delta=-6.2102$                          |                                           | 4                                                | 1105  | 44245  | 150045 | 76238  | 919    | 20     |
| $\Delta=-6.2103$                          |                                           | 17                                               | 6497  | 138236 | 120908 | 6761   | 135    | 22     |
| $\Delta=-6.2104$                          |                                           | 7                                                | 764   | 37980  | 157644 | 74680  | 1460   | 41     |
| $\Delta=-6.2105$                          |                                           | 2                                                | 1135  | 44407  | 153360 | 73116  | 537    | 19     |

TABLE S9. Similarity of misfolded structures to the native structure.

| Method | Average similarity of misfolded structures to the native structure |
|--------|--------------------------------------------------------------------|
| $M_2$  | 93.19%                                                             |
| $M_3$  | 93.10%                                                             |
| $M_4$  | 93.53%                                                             |
| $M_5$  | 93.11%                                                             |
| $M_6$  | 93.08%                                                             |
| $M_7$  | 92.79%                                                             |
